# Supplementary material
Source: HighWire-hosted journal article supplement (https://www.jneurosci.org/highwire/filestream/598778/field_highwire_adjunct_files/1/Supplemental_Legend.pdf)
Supplement: Supplemental_Legend.pdf [file Supplemental_Legend.pdf]

## Supplemental Figures

**Figure 1. *Hdh*<sup>(CAG)150</sup> mice show abnormal gait pattern.** Gait was captured by painting the paws of wild type, heterozygous, and homozygous mice with contrasting non-toxic colors prior to walking a paper-lined corridor. Gait pattern was normal in wild type mice, with overlapping fore- and hind-paws, consistent stride length and narrow stride width, at all ages. Homozygotes showed progressive and overt gait abnormalities beginning at 70 weeks. By 100 weeks, homozygotes exhibited fore- and hindpaw stride length compared to wild type littermates (Table 2a). *Hdh*<sup>(CAG)150</sup> mutants exhibit progressive decrease in forepaw base beginning at 70 weeks, which becomes significantly worse at 100 weeks (Table 2a; n=9, p < 0.05) compared to wild type. Values presented as mean ± SEM cm. \* Denotes p < 0.5 compared to WT.

**Figure 2. *Hdh*<sup>150CAG</sup> mice show no motor abnormalities up to 50 weeks of age on the balance beam.** *Hdh*<sup>(CAG)150</sup> mutant mice show no motor abnormalities up to and including 50 weeks of age, and there were no differences observed between groups in the amount of time to traverse the **(a)** 11 mm round and the **(b)** 5 mm square balance beams (11 mm  $F_{(2,10)} = 0.013$ ; 5 mm  $F_{(2,10)} = 0.179$  effect for genotype, p > 0.05) at 50 weeks.
